# Supplementary material for: Individual Variability and Test-Retest Reliability Revealed by Ten Repeated Resting-State Brain Scans over One Month
Source: PLOS journal article supplement (doi:10.1371/journal.pone.0144963), 2015-12-29
Supplement: S1 (10.1371/journal.pone.0144963.s001) [file journal.pone.0144963.s001]

| Table S1: Network |          | Visual |      | SomMot |      | DorsAttn |      | VentAttn |      | Limbic |      | Control |      | Default |      |
|-------------------|----------|--------|------|--------|------|----------|------|----------|------|--------|------|---------|------|---------|------|
|                   |          | Mean   | Perc | Mean   | Perc | Mean     | Perc | Mean     | Perc | Mean   | Perc | Mean    | Perc | Mean    | Perc |
| ALFF              | ICC      | 67%    | 16%  | 59%    | 22%  | 68%      | 13%  | 63%      | 14%  | 60%    | 1%   | 68%     | 14%  | 66%     | 21%  |
|                   | IntraVar | 24%    | 5%   | 26%    | 6%   | 26%      | 4%   | 32%      | 27%  | 37%    | 4%   | 30%     | 16%  | 32%     | 38%  |
|                   | InterVar | 51%    | 16%  | 40%    | 13%  | 57%      | 14%  | 57%      | 15%  | 57%    | 1%   | 66%     | 16%  | 63%     | 24%  |
| fALFF             | ICC      | 49%    | 17%  | 44%    | 20%  | 51%      | 15%  | 43%      | 12%  | 30%    | 0%   | 49%     | 15%  | 49%     | 22%  |
|                   | IntraVar | 38%    | 13%  | 37%    | 12%  | 38%      | 9%   | 45%      | 19%  | 58%    | 2%   | 43%     | 18%  | 44%     | 28%  |
|                   | InterVar | 37%    | 14%  | 29%    | 7%   | 41%      | 16%  | 34%      | 11%  | 26%    | 0%   | 43%     | 20%  | 43%     | 31%  |
| ReHo1             | ICC      | 64%    | 16%  | 57%    | 22%  | 63%      | 13%  | 62%      | 14%  | 53%    | 1%   | 66%     | 14%  | 64%     | 21%  |
|                   | IntraVar | 31%    | 13%  | 28%    | 7%   | 30%      | 8%   | 33%      | 18%  | 44%    | 5%   | 31%     | 14%  | 34%     | 33%  |
|                   | InterVar | 58%    | 18%  | 39%    | 12%  | 54%      | 13%  | 56%      | 15%  | 50%    | 1%   | 62%     | 16%  | 59%     | 24%  |
| ReHo2             | ICC      | 63%    | 16%  | 56%    | 22%  | 61%      | 13%  | 61%      | 14%  | 55%    | 1%   | 63%     | 14%  | 61%     | 20%  |
|                   | IntraVar | 31%    | 11%  | 24%    | 4%   | 30%      | 8%   | 32%      | 18%  | 42%    | 4%   | 33%     | 17%  | 35%     | 40%  |
|                   | InterVar | 54%    | 19%  | 32%    | 8%   | 48%      | 13%  | 51%      | 15%  | 50%    | 1%   | 57%     | 18%  | 55%     | 26%  |
