# Supplementary material for: Individual Variability and Test-Retest Reliability Revealed by Ten Repeated Resting-State Brain Scans over One Month
Source: PLOS journal article supplement (doi:10.1371/journal.pone.0144963), 2015-12-29
Supplement: S2 (10.1371/journal.pone.0144963.s002) [file journal.pone.0144963.s002]

| Table S2: Cognition |          | Hand | Mouth | Auditory | Visual | Language | Attention | Autonomic | Inhibition | Working Memory | Default | Basal | Reward |
|---------------------|----------|------|-------|----------|--------|----------|-----------|-----------|------------|----------------|---------|-------|--------|
| ALFF                | ICC      | 0.62 | 0.63  | 0.64     | 0.66   | 0.65     | 0.67      | 0.62      | 0.64       | 0.67           | 0.66    | 0.64  | 0.62   |
|                     | IntraVar | 0.27 | 0.28  | 0.30     | 0.26   | 0.30     | 0.26      | 0.31      | 0.31       | 0.29           | 0.29    | 0.31  | 0.33   |
|                     | InterVar | 0.47 | 0.48  | 0.54     | 0.53   | 0.56     | 0.56      | 0.53      | 0.58       | 0.61           | 0.58    | 0.56  | 0.54   |
| fALFF               | ICC      | 0.46 | 0.45  | 0.47     | 0.48   | 0.47     | 0.49      | 0.43      | 0.45       | 0.49           | 0.48    | 0.45  | 0.43   |
|                     | IntraVar | 0.38 | 0.40  | 0.40     | 0.39   | 0.42     | 0.39      | 0.43      | 0.44       | 0.42           | 0.41    | 0.44  | 0.45   |
|                     | InterVar | 0.33 | 0.34  | 0.36     | 0.37   | 0.38     | 0.39      | 0.33      | 0.37       | 0.40           | 0.40    | 0.36  | 0.35   |
| ReHo1               | ICC      | 0.60 | 0.61  | 0.63     | 0.64   | 0.65     | 0.63      | 0.61      | 0.64       | 0.65           | 0.64    | 0.62  | 0.61   |
|                     | IntraVar | 0.29 | 0.31  | 0.31     | 0.31   | 0.31     | 0.30      | 0.32      | 0.32       | 0.30           | 0.32    | 0.34  | 0.34   |
|                     | InterVar | 0.46 | 0.50  | 0.54     | 0.56   | 0.58     | 0.54      | 0.52      | 0.57       | 0.59           | 0.57    | 0.55  | 0.54   |
| ReHo2               | ICC      | 0.59 | 0.59  | 0.62     | 0.62   | 0.62     | 0.61      | 0.59      | 0.61       | 0.63           | 0.62    | 0.60  | 0.59   |
|                     | IntraVar | 0.27 | 0.30  | 0.29     | 0.31   | 0.31     | 0.30      | 0.31      | 0.32       | 0.31           | 0.32    | 0.34  | 0.34   |
|                     | InterVar | 0.40 | 0.44  | 0.49     | 0.51   | 0.53     | 0.49      | 0.46      | 0.52       | 0.54           | 0.53    | 0.51  | 0.49   |
